# Supplementary material
Source: PubMed Central journal article supplement (PMC7909327)
Supplement: NIHMS1671916-supplement-1.pdf [file NIHMS1671916-supplement-1.pdf]

## Supplementary Materials

**Table S1.** Summary of composition, molecular weight ( $M_n$ ), and molar mass dispersity ( $\mathcal{D}$ ) for the polymeric ciprofloxacin prodrug. Mannose monomer: mannosylated ethyl methacrylate. Drug monomer:

| <b>Mannose monomer (feed)</b> | <b>Mannose monomer* (exp)</b> | <b>Drug monomer (feed)</b> | <b>Drug monomer* (exp)</b> | <b><math>M_n^\dagger</math> (kDa)</b> | <b><math>\mathcal{D}^\dagger</math></b> | <b>Drug* (wt%)</b> | ciprofloxacin prodrug methacrylate monomer. |
|-------------------------------|-------------------------------|----------------------------|----------------------------|---------------------------------------|-----------------------------------------|--------------------|---------------------------------------------|
| mol.%                         | mol.%                         | mol.%                      | mol.%                      |                                       |                                         |                    |                                             |
| 85                            | 88.41                         | 15                         | 11.59                      | 24.2                                  | 1.087                                   | 10.56              |                                             |

\*As determined by  $^1\text{H-NMR}$  spectrum in  $\text{DMSO-d}_6$  using a Boc-protected ciprofloxacin as an internal standard

$^\dagger$ As determined by size exclusion chromatography

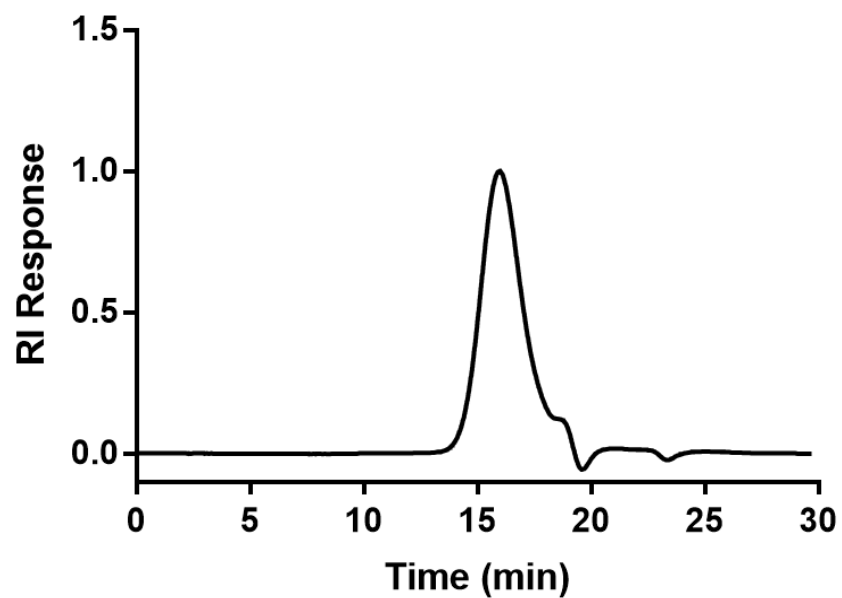

**Fig. S1.** Representative size exclusion chromatography (SEC) of polymer ciprofloxacin prodrug. RI: refractive index.

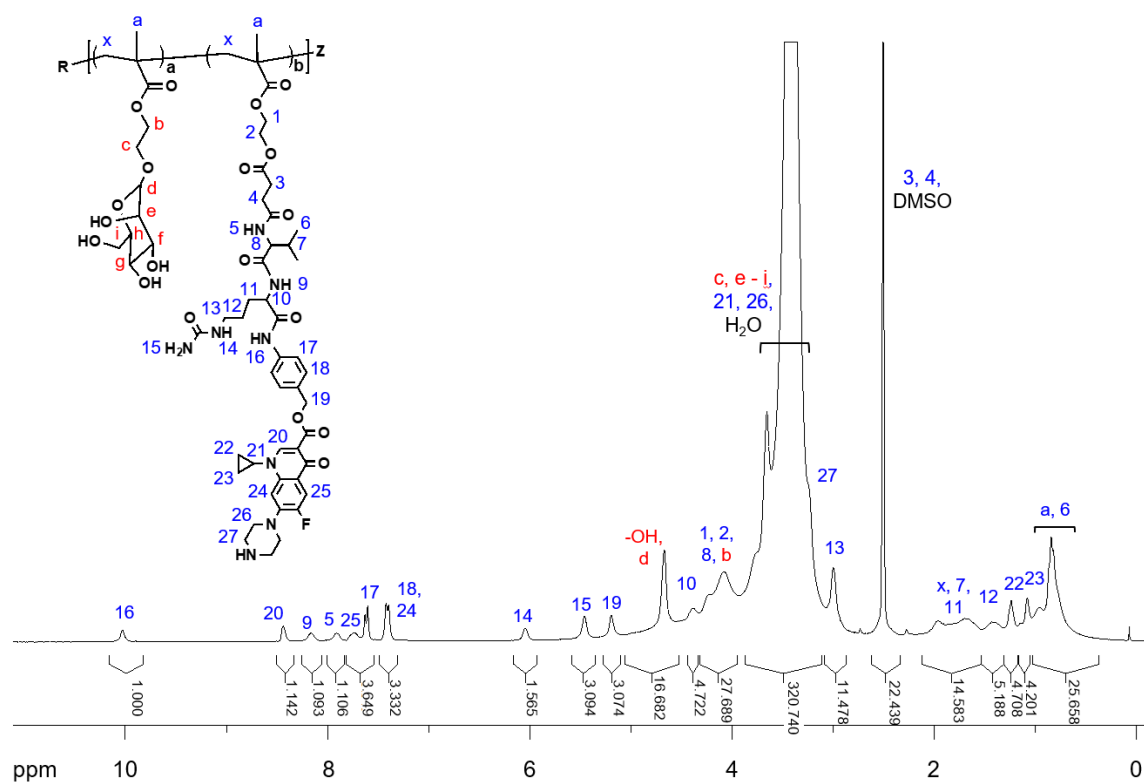

**Fig. S2.** Representative <sup>1</sup>H-NMR (300 MHz, DMSO-d<sub>6</sub>) of polymeric ciprofloxacin prodrug.
